# Supplementary material for: Unravelling Heavy Metal Dynamics in Soil and Honey: A Case Study from Maramureș Region, Romania
Source: MDPI journal article supplement (doi:10.3390/foods12193577), 2023-09-26
Supplement: s1 [file s1]

**Table S1.** Information about soil sampling sites from Maramureş, Romania

| Sam-<br>ple<br>code                                                            | Num-<br>ber of<br>sam-<br>ples | Har-<br>vest<br>period | Soil<br>details                                                                                              | Sampling<br>depth<br>(cm) | Geograph-<br>ical<br>origin | Distance<br>from the<br>source of<br>pollution<br>(~) km                 | Area/<br>Coun-<br>try         | Year of<br>har-<br>vest | Environ-<br>ment | Anthropogenic<br>influence                                                                                              |
|--------------------------------------------------------------------------------|--------------------------------|------------------------|--------------------------------------------------------------------------------------------------------------|---------------------------|-----------------------------|--------------------------------------------------------------------------|-------------------------------|-------------------------|------------------|-------------------------------------------------------------------------------------------------------------------------|
| <i>Soil samples exposed to anthropogenic sources of heavy metals pollution</i> |                                |                        |                                                                                                              |                           |                             |                                                                          |                               |                         |                  |                                                                                                                         |
| S1-2019                                                                        | 3                              | June<br>July           | The col-<br>lected sam-<br>ple corre-<br>sponds to<br>the hive<br>where<br>chestnut<br>honey was<br>obtained | 0 – 10 cm                 | Tăuții de Sus               | 3.5 km to<br>the set-<br>tling<br>ponds<br><i>Aurul</i>                  | Maramureş Country/<br>Romania | 2019                    | Semi-rural       | Near (~ 3.5 km distance) to the set-<br>tling pond mining (decant pond)<br><i>Aurul</i> <sup>1</sup> from Tăuții de Sus |
| S1-2020                                                                        | 2                              |                        |                                                                                                              |                           |                             | 4.0 km to<br>the set-<br>tling<br>ponds<br><i>Aurul</i>                  |                               | 2020                    |                  | Near (~ 4.0 km distance) to the set-<br>tling pond mining (decant pond)<br><i>Aurul</i> <sup>1</sup> from Tăuții de Sus |
| S1-2021                                                                        | 2                              |                        |                                                                                                              |                           |                             | 3.8 km to<br>the set-<br>tling<br>ponds<br><i>Aurul</i>                  |                               | 2021                    |                  | Near (~ 3.8 km distance) to the set-<br>tling pond mining (decant pond)<br><i>Aurul</i> <sup>1</sup> from Tăuții de Sus |
| S2-2018                                                                        | 1                              | June<br>July           | The col-<br>lected sam-<br>ple corre-<br>sponds to<br>the hive<br>where<br>chestnut<br>honey was<br>obtained | 0 – 10 cm                 | Tăuții<br>Măgherauş         | 9.0 km to<br>the<br>Nistru<br>mine and<br>6.0 km to<br>the Băiţa<br>mine | Maramureş Country/<br>Romania | 2018                    | Rural            | Near (~ 9.0 km distance) to the<br>Nistru mine and (~ 6.0 km distance)<br>to Băiţa mine                                 |
| S2-2019                                                                        | 1                              |                        |                                                                                                              |                           |                             | 11.0 km<br>to the<br>Nistru<br>mine and<br>8.0 km to                     |                               | 2019                    | Rural            | Near (~ 11.0 km distance) to the<br>Nistru mine and (~ 8.0 km distance)<br>to Băiţa mine                                |

|         |   |           |                                                                                  |           |                  |                                                         |                              |            |                                                                                                                |      |            |                                                                                                                 |  |
|---------|---|-----------|----------------------------------------------------------------------------------|-----------|------------------|---------------------------------------------------------|------------------------------|------------|----------------------------------------------------------------------------------------------------------------|------|------------|-----------------------------------------------------------------------------------------------------------------|--|
|         |   |           |                                                                                  |           |                  |                                                         |                              |            |                                                                                                                |      |            |                                                                                                                 |  |
|         |   |           |                                                                                  |           |                  | the Băița mine                                          |                              |            |                                                                                                                |      |            |                                                                                                                 |  |
|         |   |           |                                                                                  |           |                  | 11.2 km to the Nistru mine and 8.3 km to the Băița mine |                              |            |                                                                                                                |      |            |                                                                                                                 |  |
| S2-2021 | 2 |           |                                                                                  |           |                  |                                                         | 2021                         | Rural      | Near (~ 11.2 km distance) to the Nistru mine and (~ 8.3 km distance) to Băița mine                             |      |            |                                                                                                                 |  |
| S3-2019 | 2 |           |                                                                                  |           |                  | 8.0 km to the settling ponds <i>Aurul</i>               | Maramureș<br>Country/Romania | 2019       |                                                                                                                |      |            |                                                                                                                 |  |
| S3-2020 | 2 |           |                                                                                  |           |                  |                                                         |                              |            |                                                                                                                |      |            |                                                                                                                 |  |
| S3-2021 | 3 | June July | The collected sample corresponds to the hive where chestnut honey was obtained   | 0 – 10 cm | Baia Mare        |                                                         |                              |            |                                                                                                                | 2021 | Semi-rural | Near (~ 8.0 km distance) to the settling pond mining (decant pond) <i>Aurul</i> <sup>1</sup> from Tăuții de Sus |  |
|         |   |           |                                                                                  |           |                  |                                                         |                              |            |                                                                                                                |      |            |                                                                                                                 |  |
| S4-2021 | 1 | June July | The collected sample corresponds to the hive where polyfloral honey was obtained | 0 – 10 cm | Tăuții Măgherauș | 6.5 km to the settling ponds <i>Aurul</i>               | 2021                         | Semi-rural | Near (~ 8.0 km distance) to the settling pond mining (decant pond) <i>Aurul</i> <sup>1</sup> from Bozânta Mare |      |            |                                                                                                                 |  |

| Table 1. Sampling locations and details of honey samples collected |                 |                |                                                                                  |                    |                    |                                            |                               |      |             |                                                                                                                 |
|--------------------------------------------------------------------|-----------------|----------------|----------------------------------------------------------------------------------|--------------------|--------------------|--------------------------------------------|-------------------------------|------|-------------|-----------------------------------------------------------------------------------------------------------------|
| Sample ID                                                          | Number of hives | Month          | Location                                                                         | Distance from hive | Distance from mine | Distance from settlement                   | Country                       | Year | Environment | Notes                                                                                                           |
| S <sub>5-2019</sub>                                                | 2               | July<br>August | The collected sample corresponds to the hive where polyfloral honey was obtained | 0 – 10 cm          | Baia Sprie         | 8.0 km to the Herja mine                   | Maramureş Country/<br>Romania | 2019 | Rural       | Near (~ 8.0 km distance) to the Herja mine                                                                      |
| S <sub>6-2020</sub>                                                | 1               | July<br>August | The collected sample corresponds to the hive where acacia honey was obtained     | 0 – 10 cm          | Baia Mare          | 8.0 km to the settling ponds <i>Aurul</i>  | Maramureş Country/<br>Romania | 2020 | Semi-rural  | Near (~ 8.0 km distance) to the settling pond mining (decant pond) <i>Aurul</i> <sup>1</sup> from Tăuţii de Sus |
| S <sub>6-2021</sub>                                                | 1               | July<br>August |                                                                                  |                    |                    |                                            |                               | 2021 | Semi-rural  |                                                                                                                 |
| S <sub>7-2017</sub>                                                | 1               | July<br>August | The collected sample corresponds to the hive where polyfloral honey was obtained | 0 – 10 cm          | Baia Borşa         | 5.1 km to the Băile Borşa mining flotation | Maramureş Country/<br>Romania | 2017 | Rural       | Near (~ 5.1 km distance) to the Băile Borşa mining flotation                                                    |
| S <sub>7-2019</sub>                                                | 1               | July<br>August |                                                                                  |                    |                    | 7.3 km to the Băile Borşa mining flotation |                               | 2019 | Rural       | Near (~ 7.3 km distance) to the Băile Borşa mining flotation                                                    |
| S <sub>7-2020</sub>                                                | 1               | July<br>August | The collected sample corresponds to the hive where polyfloral                    | 0 – 10 cm          | Baia Borşa         | 9.0 km to the Băile Borşa mining flotation |                               | 2020 | Rural       | Near (~ 9.0 km distance) to the Băile Borşa mining flotation                                                    |

| Background soil samples |   |             |                                                                                  |           |                   |                                            |                               |      |            |                                                              |
|-------------------------|---|-------------|----------------------------------------------------------------------------------|-----------|-------------------|--------------------------------------------|-------------------------------|------|------------|--------------------------------------------------------------|
|                         |   |             | honey was obtained                                                               |           |                   |                                            |                               |      |            |                                                              |
| S7-2021                 | 1 | July August | The collected sample corresponds to the hive where polyfloral honey was obtained | 0 – 10 cm | Baia Borşa        | 8.0 km to the Băile Borşa mining flotation | Maramureş Country/<br>Romania | 2021 | Rural      | Near (~ 8.0 km distance) to the Băile Borşa mining flotation |
| S8-2021                 | 2 | July August | The collected sample corresponds to the hive where polyfloral honey was obtained | 0 – 10 cm | Satulung          | 5.0 km to the European Road (E 58)         | Maramureş Country/<br>Romania | 2021 | Semi-rural | Near (~ 5.0 km distance) to the European Road (E 58)         |
| S9-2020                 | 1 | July August | The collected sample corresponds to the hive where polyfloral honey was obtained | 0 – 10 cm | Săcălăşeni        | 8.0 km to the European Road (E 58)         | Maramureş Country/<br>Romania | 2020 | Semi-rural | Near (~ 8.0 km distance) to the European Road (E 58)         |
| Background soil samples |   |             |                                                                                  |           |                   |                                            |                               |      |            |                                                              |
| S10-2020                | 2 | August      | The collected sample corresponds to the hive                                     | 0 – 10 cm | Groşii Țibleşului | -                                          |                               | 2020 | Rural      | -                                                            |

|          |   |        | where<br>polyfloral<br>honey was<br>obtained                                                             |           |              |   |                               |      |            |   |
|----------|---|--------|----------------------------------------------------------------------------------------------------------|-----------|--------------|---|-------------------------------|------|------------|---|
| S11-2018 | 2 | August | The<br>collected<br>sample<br>corresponds<br>to the hive<br>where<br>polyfloral<br>honey was<br>obtained | 0 – 10 cm | Vişeu de Sus | - | Maramureş Country/<br>Romania | 2018 | Rural      | - |
| S11-2019 | 1 | August | The<br>collected<br>sample<br>corresponds<br>to the hive<br>where<br>polyfloral<br>honey was<br>obtained | 0 – 10 cm | Vişeu de Sus | - | Maramureş Country/<br>Romania | 2019 | Semi-rural | - |
| S11-2020 | 2 | August | The<br>collected<br>sample<br>corresponds<br>to the hive<br>where<br>polyfloral<br>honey was<br>obtained | 0 – 10 cm | Vişeu de Sus | - | Maramureş Country/<br>Romania | 2020 | Urban      | - |

|                                                                                                                                                                                                                                                                                                                                                                                                                                                                                                                                                                                     |   |        |                                                                                  |           |              |   |                               |      |                |   |
|-------------------------------------------------------------------------------------------------------------------------------------------------------------------------------------------------------------------------------------------------------------------------------------------------------------------------------------------------------------------------------------------------------------------------------------------------------------------------------------------------------------------------------------------------------------------------------------|---|--------|----------------------------------------------------------------------------------|-----------|--------------|---|-------------------------------|------|----------------|---|
| S11-2021                                                                                                                                                                                                                                                                                                                                                                                                                                                                                                                                                                            | 1 | August | The collected sample corresponds to the hive where polyfloral honey was obtained | 0 – 10 cm | Vișeu de Sus | - | Maramureș Country/<br>Romania | 2021 | Non-urban area | - |
| S = soil sample (it does not refer to sites); the collection of soil samples from 9 sites was carried out strictly according to the type of honey and to the year of production, e.g., from Tăuții de Sus site, three main soil samples were collected (subsamples n = seven), these correspond to the chestnut honey obtaining in the 2019-2021 years (e.g., for the chestnut honey produced in 2019 were collected three soil subsamples); N° of samples = number of soil samples harvested form each site, depending of the type of honey and the year in which it was obtained. |   |        |                                                                                  |           |              |   |                               |      |                |   |

**Table S2.** Information about honey sampling sites from Maramureș, Romania

| Sample code                                                                     | Number of samples | Harvest period | Honey details           | Denomination      | Geographical origin | Distance from the source of pollution (~) km of the hives | Area/<br>Country          | Year of harvest | Type of extraction | Environment | Anthropogenic influence                                                                                            | Bee species           |
|---------------------------------------------------------------------------------|-------------------|----------------|-------------------------|-------------------|---------------------|-----------------------------------------------------------|---------------------------|-----------------|--------------------|-------------|--------------------------------------------------------------------------------------------------------------------|-----------------------|
| <i>Honey samples exposed to anthropogenic sources of heavy metals pollution</i> |                   |                |                         |                   |                     |                                                           |                           |                 |                    |             |                                                                                                                    |                       |
| H1-2019                                                                         | 2                 | June<br>July   | Raw<br>artisan<br>honey | Chestnut<br>honey | Tăuții de Sus       | 3.5 km to the settling ponds<br><i>Aurul</i>              | Maramureș Country/Romania | 2019            | Manual             | Semi-rural  | Near (~ 3.5 km distance) to the settling pond mining (decant pond)<br><i>Aurul</i> <sup>1</sup> from Tăuții de Sus | <i>Apis mellifera</i> |
| H1-2020                                                                         | 1                 |                |                         |                   |                     |                                                           |                           | 2020            |                    |             |                                                                                                                    |                       |
| H1-2021                                                                         | 3                 |                |                         |                   |                     |                                                           |                           | 2021            |                    |             |                                                                                                                    |                       |
| H2-2018                                                                         | 1                 | June<br>July   | Raw<br>artisan<br>honey | Chestnut<br>honey | Tăuții Măgherauș    | 9.0 km to the Nistru mine and                             | Maramureș Country/Romania | 2018            | Manual             | Rural       | Near (~ 9.0 km distance) to the                                                                                    | <i>Apis mellifera</i> |
| H2-2019                                                                         | 1                 |                |                         |                   |                     |                                                           |                           | 2019            |                    |             |                                                                                                                    |                       |

|                     |   |                |                         |                     |                     |                                                    |      |            |                                                                             |                                                                                                                               |                                                 |
|---------------------|---|----------------|-------------------------|---------------------|---------------------|----------------------------------------------------|------|------------|-----------------------------------------------------------------------------|-------------------------------------------------------------------------------------------------------------------------------|-------------------------------------------------|
|                     |   |                |                         |                     |                     |                                                    |      |            |                                                                             |                                                                                                                               |                                                 |
| H <sub>2-2021</sub> | 1 |                |                         |                     |                     | 6.0 km to the Băița mine                           | 2021 |            | Nistru mine and (~6.0 km distance) to Băița mine                            |                                                                                                                               |                                                 |
| H <sub>3-2019</sub> | 2 | June<br>July   | Raw<br>artisan<br>honey | Chestnut<br>honey   | Baia Mare           | 8.0 km to the<br>settling<br>ponds<br><i>Aurul</i> | 2019 |            | Near (~ 8.0 km distance) to the<br>settling pond<br>mining (decant<br>pond) | <i>Apis<br/>mellifera</i>                                                                                                     |                                                 |
| H <sub>3-2020</sub> | 2 |                |                         |                     |                     |                                                    | 2020 | Manual     | Semi-rural                                                                  |                                                                                                                               | <i>Aurul</i> <sup>1</sup> from<br>Tăuții de Sus |
| H <sub>4-2021</sub> | 3 | June<br>July   | Artisan<br>honey        | Polyfloral<br>honey | Tăuții<br>Măgherauș | 6.5 km to the<br>settling<br>ponds<br><i>Aurul</i> | 2021 | Mechanical | Semi-rural                                                                  | Near (~ 6.5 km distance) to the<br>settling pond<br>mining (decant<br>pond)<br><i>Aurul</i> <sup>1</sup> from<br>Bozânta Mare | <i>Apis<br/>mellifera</i>                       |
| H <sub>5-2019</sub> | 1 | July<br>August | Artisan<br>honey        | Polyfloral<br>honey | Baia Sprie          | 8.0 km to the Herja mine                           | 2019 | Manual     | Rural                                                                       | Near (~ 8.0 km distance) to the<br>Herja mine                                                                                 | <i>Apis<br/>mellifera</i>                       |
| H <sub>6-2020</sub> | 2 | July<br>August | Artisan<br>honey        | Acacia              | Baia Mare           | 8.0 km to the<br>settling<br>ponds<br><i>Aurul</i> | 2020 |            |                                                                             | Near (~ 8.0 km distance) to the<br>settling pond<br>mining (decant<br>pond)                                                   | <i>Apis<br/>mellifera</i>                       |
| H <sub>6-2021</sub> | 1 |                |                         |                     |                     |                                                    | 2021 | Mechanical | Semi-rural                                                                  | <i>Aurul</i> <sup>1</sup> from<br>Tăuții de Sus                                                                               |                                                 |
| H <sub>7-2017</sub> | 1 | July<br>August | Artisan<br>honey        | Polyfloral<br>honey | Baia Borșa          | 5.1 km to the Băile Borșa                          | 2017 | Manual     | Rural                                                                       | Near (~ 5.1 km distance) to the<br>Băile Borșa                                                                                | <i>Apis<br/>mellifera</i>                       |

| H7-2019                  | 1 |                |                  |                     |                      |                                                | Mining<br>Flatation          | 2019 |            |            |                                                                                                   | Mining<br>Flatation       |
|--------------------------|---|----------------|------------------|---------------------|----------------------|------------------------------------------------|------------------------------|------|------------|------------|---------------------------------------------------------------------------------------------------|---------------------------|
| <hr/>                    |   |                |                  |                     |                      |                                                |                              |      |            |            |                                                                                                   |                           |
| H7-2020                  | 1 |                |                  |                     |                      |                                                |                              | 2020 |            |            |                                                                                                   |                           |
| <hr/>                    |   |                |                  |                     |                      |                                                |                              |      |            |            |                                                                                                   |                           |
| H7-2021                  | 1 |                |                  |                     |                      |                                                |                              | 2021 |            |            |                                                                                                   |                           |
| <hr/>                    |   |                |                  |                     |                      |                                                |                              |      |            |            |                                                                                                   |                           |
| H8-2021                  | 2 | July<br>August | Artisan<br>honey | Polyfloral<br>honey | Satulung             | 5.0 km to<br>the<br>European<br>Road (E<br>58) | Maramureş<br>Country/Romania | 2021 | Mechanical | Semi-rural | Near (~ 5.0 km<br>distance)<br>European<br>Road (E 58),<br>with intense<br>traffic of<br>vehicles | <i>Apis<br/>mellifera</i> |
| H9-2020                  | 1 | July<br>August | Artisan<br>honey | Polyfloral<br>honey | Săcălăşeni           | 8.0 km to<br>the<br>European<br>Road (E<br>58) |                              | 2020 | Mechanical | Semi-rural | Near (~ 8.0 km<br>distance)<br>European<br>Road (E 58),<br>with intense<br>traffic of<br>vehicles | <i>Apis<br/>mellifera</i> |
| Background honey samples |   |                |                  |                     |                      |                                                |                              |      |            |            |                                                                                                   |                           |
| H10-2020                 | 2 | August         | Artisan<br>honey | Polyfloral<br>honey | Groşii<br>Țibleşului | -                                              | Maramureş<br>Country/Romania | 2020 | Mechanical | Rural      | -                                                                                                 | <i>Apis<br/>mellifera</i> |
| H11-2018                 | 3 | August         | Artisan<br>honey | Polyfloral<br>honey | Vişeu de Sus         |                                                |                              | 2018 | Manual     | Rural      | -                                                                                                 | <i>Apis<br/>mellifera</i> |



---

|                      |   |            |                   |
|----------------------|---|------------|-------------------|
| H <sub>11-2019</sub> | 1 | 2019       | Semi-rural        |
|                      |   | Mechanical |                   |
| H <sub>11-2020</sub> | 2 | 2020       | Urban             |
|                      |   |            |                   |
| H <sub>11-2021</sub> | 3 | 2021       | Manual            |
|                      |   |            | Non-urban<br>area |

---

<sup>1</sup>Settling Pond Mining *Aurul* resulting from the processing of blank ores in the Baia Sprie Mine Preparation Plant and which contains approximately 13.5 tons of mine tailings stored in the 1965-2003 period. At present Settling Pond Mining *Aurul* is the property of the National Company Remin SA Baia Mare (*Compania Națională Remin SA Baia Mare*) [47].

**Table S3.** The program of the microwave oven Milestone START D Microwave Digestion System

| Step  | Target Temp (°C) | Pressure Max. (psi) | Temperature Ramp (min.) | Hold Time (min.) | Power (%) |
|-------|------------------|---------------------|-------------------------|------------------|-----------|
| Soil  |                  |                     |                         |                  |           |
| 1.    | 220              | 800                 | 10                      | 20               | 100       |
| 2.    | 220              | 800                 | 10                      | 15               | 60        |
| 3.    | 35-40            | 800                 | -                       | 45 min. cooling  | -         |
| Honey |                  |                     |                         |                  |           |
| 1.    | 200              | 800                 | 10                      | 20               | 100       |
| 2.    | 200              | 800                 | 10                      | 15               | 55        |
| 3.    | 35-40            | 800                 | -                       | 45 min. cooling  | -         |

**Table S4.** Instrumental (a) and data acquisition (b) parameters of ICP-MS

| (a) Instrumental parameters               |             | (b) Data acquisition parameters for quantitative mode |                                                          |
|-------------------------------------------|-------------|-------------------------------------------------------|----------------------------------------------------------|
| RF power/W                                | 1.4 kW      | Measuring mode                                        | Standard (Ar 5.0)<br>Q Cell (Collision Cell)<br>(He 6.0) |
| Argon (Ar) gas flow, Helium (He) gas flow |             | Point per peak                                        | 3                                                        |
| Nebulizer                                 | 1.0 L/min.  | Scans/Replicate                                       | 7                                                        |
| Plasma gas low rate (Ar 5.0)              | 18.0 L/min. | Replicate/Sample                                      | 7                                                        |
| Auxiliary gas flow rate (He 6.0)          | 0.20 L/min. |                                                       |                                                          |
| Lens voltage                              | 37 V        | Dwell time (ms)                                       | 3                                                        |
| Mirror lens right                         | 32 V        |                                                       |                                                          |
| Mirror lens bottom                        | 31 V        |                                                       |                                                          |
| Sample uptake rate                        | 90 s        | Integration time                                      | 1-5 ms                                                   |
| Temperature spray chamber                 |             |                                                       | 2.10 °C                                                  |
| Background correction                     |             |                                                       | 2 points/peak                                            |
| Injector tube                             |             |                                                       | quartz 2-mm id                                           |
| Sample cone                               |             |                                                       | Sample Cone 4450                                         |
| Skimmer cone                              |             | Ni – Skimmer iCAP Q 0.5 mm insert version             |                                                          |
| Nebulizer                                 |             | MicroMist Nebulizer 0.4 mL/min.                       |                                                          |

**Table S5.** Instrumental conditions for the determination of each element using the ICP-MS technique

| Element | Correlation coefficient | LoD (µg/L) | LoQ (µg/L) | BEC (µg/L) | Element | Correlation coefficient | LoD (µg/L) | LoQ (µg/L) | BEC (µg/L) |
|---------|-------------------------|------------|------------|------------|---------|-------------------------|------------|------------|------------|
| Cu      | 0.9996                  | 0.0414     | 1.545      | 1.258      | Zn      | 0.9999                  | 0.079      | 1.203      | 1.310      |
| Pb      | 0.9996                  | 0.231      | 0.231      | 0.649      | Cd      | 0.9997                  | 0.007      | 0.069      | 0.0031     |
| Ni      | 0.9997                  | 0.045      | 0.181      | 0.096      | Co      | 0.9997                  | 0.051      | 0.136      | 0.152      |
| As      | 0.9999                  | 0.006      | 0.743      | 0.018      | Cr      | 0.9999                  | 1.607      | 5.533      | 0.637      |
| Hg      | 0.9999                  | 0.043      | 0.1379     | 0.128      |         |                         |            |            |            |

LoD = Detection limit; LoQ = Quantification limit; BEC = Background equivalent concentration.

**Table S6.** Validation parameters of the analytical procedure for the determination of heavy metals (soil)

| Element                 | Certified reference material analysis |                                      | Validation parameters |                 |
|-------------------------|---------------------------------------|--------------------------------------|-----------------------|-----------------|
|                         | The result declared by de manufacture | The results obtained in our research | Recovery (%)          | Uncertainty (%) |
| Cu (mg/kg) <sup>a</sup> | 34.6 ± 0.7                            | 32.45 ± 2.78                         | 96.7                  | 19              |
| Zn (mg/kg) <sup>a</sup> | 106 ± 3                               | 100.1 ± 3.04                         | 95.2                  | 18              |
| Pb (mg/kg) <sup>b</sup> | 18.9 ± 0.5                            | 19.16 ± 0.84                         | 96.0                  | 11              |
| Cd (mg/kg) <sup>a</sup> | 0.38 ± 0.01                           | 0.37 ± 0.01                          | 99.1                  | 12              |
| Ni (mg/kg) <sup>a</sup> | 88 ± 5                                | 85.8 ± 2.36                          | 85.3                  | 16              |
| Co (mg/kg) <sup>a</sup> | 13.4 ± 0.7                            | 13.97 ± 0.75                         | 95.5                  | 21              |
| As (mg/kg) <sup>a</sup> | 17.7 ± 0.8                            | 16.7 ± 0.94                          | 92.6                  | 22              |
| Cr (mg/kg) <sup>a</sup> | 103 ± 4                               | 101.21 ± 2.36                        | 98.8                  | 18              |
| Hg (mg/kg) <sup>a</sup> | 1.4 ± 0.08                            | 1.29 ± 0.02                          | 98.7                  | 13              |

1. <sup>a</sup> SRM – 2709a Standard Reference Material „San Joaquin Soil” Baseline Trace Element Concentration.

**Table S7.** Validation parameters of the analytical procedure for the determination of heavy metals (honey)

| Element                 | Certified reference material analysis |                                      | Validation parameters |                 |
|-------------------------|---------------------------------------|--------------------------------------|-----------------------|-----------------|
|                         | The result declared by de manufacture | The results obtained in our research | Recovery (%)          | Uncertainty (%) |
| Cu (mg/kg) <sup>a</sup> | 4.70 ± 0.14                           | 4.42 ± 0.31                          | 96.87                 | 23              |
| Zn (mg/kg) <sup>a</sup> | 30.94 ± 0.55                          | 31.84 ± 0.86                         | 100.12                | 17              |
| Pb (mg/kg) <sup>b</sup> | 0.167 ± 0.015                         | 0.164 ± 0.003                        | 96.78                 | 22              |
| Cd (mg/kg) <sup>a</sup> | 1.517 ± 0.027                         | 1.687 ± 0.147                        | 90.32                 | 23              |
| Ni (mg/kg) <sup>a</sup> | 1.582 ± 0.041                         | 1.784 ± 0.084                        | 98.70                 | 18              |
| Co (mg/kg) <sup>a</sup> | 0.5773 ± 0.071                        | 0.6541 ± 0.321                       | 107.18                | 24              |
| As (mg/kg) <sup>a</sup> | 0.1126 ± 0.024                        | 0.1126 ± 0.062                       | 117.89                | 16              |
| Cr (mg/kg) <sup>a</sup> | 1.988 ± 0.034                         | 2.124 ± 0.070                        | 92.69                 | 21              |
| Hg (mg/kg) <sup>a</sup> | 0.0341 ± 0.0015                       | 0.023 ± 0.017                        | 95.84                 | 10              |

2. <sup>a</sup> NIST – 1573a Tomato Leaves Standard Reference Materials; <sup>b</sup> NIST – 1575a Pine Needles (*Pinus taeda*) Standard Reference Materials

**Table S8.** The influence of factors on the concentration of heavy metals in the soil sites from Maramureș, Romania

| Element / Factor                       | Cu   | Zn  | Pb  | Cd  | Ni  | Co  | As  | Cr  | Hg |
|----------------------------------------|------|-----|-----|-----|-----|-----|-----|-----|----|
|                                        | Sig. |     |     |     |     |     |     |     |    |
| Area                                   | ***  | *** | *** | *** | *** | *** | *** | *** | -  |
| Year                                   | ns   | ns  | ns  | ns  | ns  | ns  | ns  | ns  | -  |
| Distance from the sources of pollution | ***  | *** | *** | *** | *** | *** | *** | *** | -  |
| Anthropogenic influence                | ***  | *** | *** | *** | *** | *** | *** | *** | -  |
| Environment                            | *    | ns  | -  |
| Soil details*                          | ***  | *** | *** | *** | *** | *** | *** | *** | -  |

\*The collected soil sample corresponds to the type of analyzed honey (chestnut, polyfloral, and acacia honey).

**Table S9.** The influence of factors on the concentration of heavy metals in honey sites from Maramureș, Romania

| Element / Factor                       | Cu   | Zn  | Pb  | Cd  | Ni  | Co | As | Cr  | Hg |
|----------------------------------------|------|-----|-----|-----|-----|----|----|-----|----|
|                                        | Sig. |     |     |     |     |    |    |     |    |
| Area                                   | ***  | *** | *** | *** | *** | -  | -  | *** | -  |
| Year                                   | ns   | ns  | ns  | ns  | ns  | -  | -  | ns  | -  |
| Distance from the sources of pollution | ***  | *** | *** | *** | *** | -  | -  | *** | -  |
| Anthropogenic influence                | ***  | *** | *** | *** | *** | -  | -  | *** | -  |
| Environment                            | **   | ns  | ns  | ns  | ns  | -  | -  | ns  | -  |
| Honey details*                         | ***  | *** | *** | *** | *** | -  | -  | *** | -  |

\*The collected soil sample corresponds to the type of analyzed honey (chestnut, polyfloral, and acacia honey).
